# Supplementary material for: CORM-A1 Alleviates Pro-Atherogenic Manifestations via miR-34a-5p Downregulation and an Improved Mitochondrial Function
Source: MDPI journal article supplement (doi:10.3390/antiox12050997), 2023-04-25
Supplement: s1 [file s1]

**Table S1.** List of Rat primers.

| Target         | Primer | Sequence (5' → 3')          | Accession Number    |
|----------------|--------|-----------------------------|---------------------|
| miR34a-5p      | FP     | GCAGTGGCAGTGTCTTAG          | <u>MIMAT0000815</u> |
|                | RP     | GGTCCAGTTTTTTTTTTTTTTTACAAC |                     |
| U6             | FP     | CTCGCTTCGGCAGCACA           | XR_005498700        |
|                | RP     | AACGCTTCACGAATTTGCGT        |                     |
| p53            | FP     | ATGGGTTCAGCACTTAGCC         | XM_008767773.3      |
|                | RP     | GAAGATTCCTGGTAGCGCA         |                     |
| SIRT1          | FP     | TATGCTCGCCTTGCTGTGGA        | NM_001372090        |
|                | RP     | GCTGAGTTGCTGGATTTTGTGT      |                     |
| PGC-1 $\alpha$ | FP     | TTCAGGAGCTGGATGGCTTG        | XM_039092489        |
|                | RP     | GGGCAGCACACTCTATGTCA        |                     |
| ZEB1           | FP     | TGCCAAACTGCAAGAAACG         | XM_039095413        |
|                | RP     | GGACTGCCTGGTGATGTTGA        |                     |
| SNAI1          | FP     | AGTTGTCTACCGACCTTGCG        | NM_053805           |
|                | RP     | TGCAGCTCGCTATAGTTGGG        |                     |
| ICAM-1         | FP     | GCCTGGGGTTGGAGACTAAC        | XM_039080880        |
|                | RP     | CTGTCTTCCCCAATGTGCT         |                     |
| VCAM-1         | FP     | CCTCTCGGGAAATGCCACC         | NM_012889           |
|                | RP     | GTCAGAACAACGGAATCCCCA       |                     |
| GAPDH          | FP     | CAACGGGAAACCCATCACCA        | XM_039107008        |
|                | RP     | ACGCCAGTAGACTCCACGACAT      |                     |
| TrXR2          | FP     | AGGGCAGCAGAACTTTGATCT       | NM_022584           |
|                | RP     | GGTTCCACATAGTCAGCCA         |                     |
| SOD2           | FP     | CGGGGGCCATATCAATCACA        | NM_017051           |
|                | RP     | TAGCCTCCAGCAACTCTCCT        |                     |

**Table S2.** List of human primers for qPCR.

| Target         | Primer | Sequence (5' → 3')          | Accession Number |
|----------------|--------|-----------------------------|------------------|
| miR-34a-5p     | FP     | CGAGTGGCAGTGTCTTAGCT        | MIMAT0000255     |
|                | RP     | CCAGTTTTTTTTTTTTTTTTTACAACC |                  |
| 5S             | FP     | GGCCATACCACCCTGAACGC        | 6XA1_L7          |
|                | RP     | CAGCACCCGGTATTCCCAGG        |                  |
| 18s rRNA       | FP     | CGTTCAGCCACCCGAGATT         | 7MQ9_L1          |
|                | RP     | GACCCGCACTTACTGGGAATT       |                  |
| SIRT1          | FP     | GATACCTTGGAGCAGGTTGC        | NM_012238        |
|                | RP     | CTCCACGAACAGCTTCACAA        |                  |
| PGC1 $\alpha$  | FP     | AGTCTTCGGCTGTTTGGTGA        | NM_013261        |
|                | RP     | TGGAAGAACAGATGTGCCCC        |                  |
| NF- $\kappa$ b | FP     | GAGGTCTCTGGGGGTACCAT        | NM_021975        |
|                | RP     | AAGGCTGCCTGGATCACTTC        |                  |
| P53            | FP     | ATTGGCCAGACTGCCTTCC         | NM_001276761     |
|                | RP     | TCCGGGGACAGCATCAAATC        |                  |
| ZEB1           | FP     | GCGGCGCAATAACGTTACAAA       | NM_001174096     |
|                | RP     | TTCCTTTCTGTGTATCCTCCC       |                  |
| SNAI1          | FP     | CTCGGACCTTCTCCGAATG         | NM_005985        |
|                | RP     | TCATCAAAGTCTGTGGGGC         |                  |
| STAT3          | FP     | ATCACGCCTTCTACAGACTGC       | NM_001384990     |
|                | RP     | CATCCTGGAGATTCTCTACCACT     |                  |
| SOD2           | FP     | GCACTAGCAGCATGTTGAGC        | NM_001322815     |
|                | RP     | CCGTTAGGGCTGAGGTTTGT        |                  |
| TrxR2          | FP     | GATTAGGAGGGCGCTTCCG         | NM_001352300     |
|                | RP     | GTTGGGGGCATCTTGATCA         |                  |
| 18s rRNA       | FP     | CGTTCAGCCACCCGAGATT         | 7MQ9_L1          |
|                | RP     | GACCCGCACTTACTGGGAATT       |                  |

FP: Forward Primer; RP: Reverse Prime.

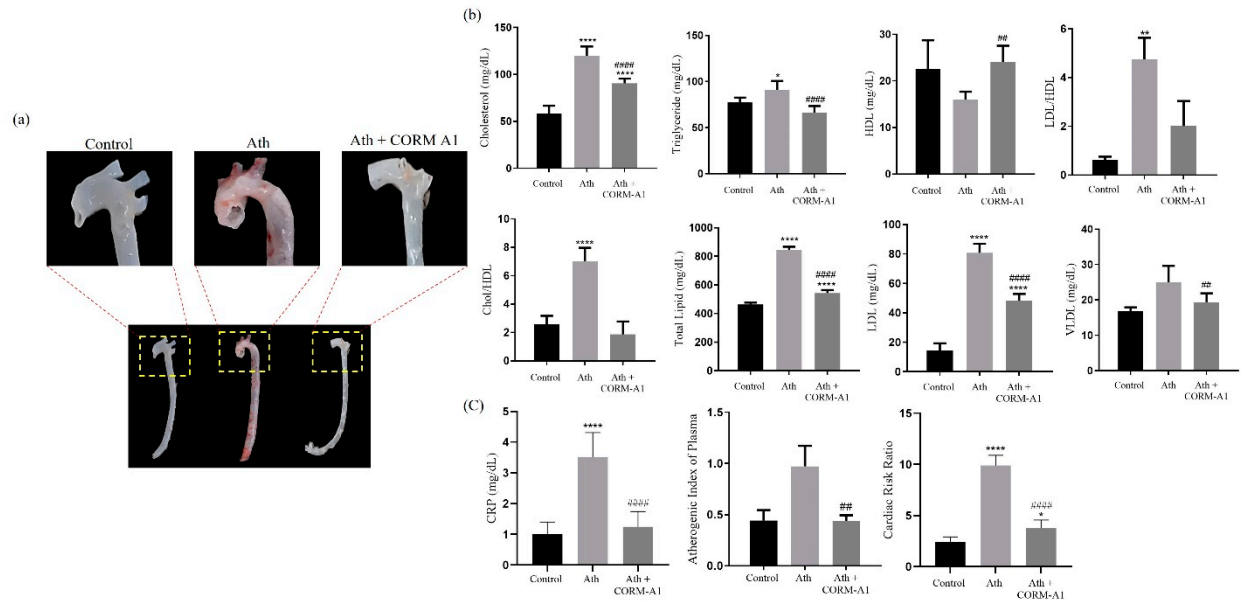

**Figure S1.** CORM-A1 treatment depresses atherogenic lesion and improves serum lipid profile in ath diet fed SD rats. (a) *En Face* Assay of thoracic aorta of SD rats comparing aorta of control, ath and ath + CORM-A1 groups. (b) Serum lipid profile of SD rats, represented as fold change (n=6). (c) Quantification of C reactive protein (CRP) and calculation of Atherogenic index of plasma (AIP) and Cardiac Risk ratio (CRR), represented as fold change. Results are expressed as mean  $\pm$  S.E.M. \* $p$  < 0.05, \*\* $p$  < 0.01, \*\*\* $p$  < 0.001 or \*\*\*\* $p$  < 0.0001 on comparison to control and ## $p$  < 0.01, or ### $p$  < 0.0001 on comparison to ath diet fed SD rats.

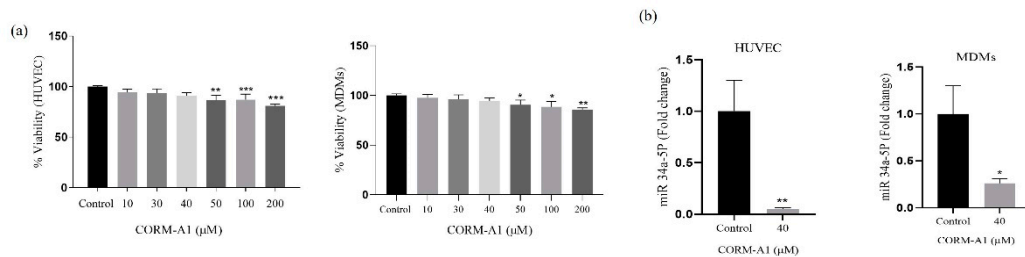

**Figure S2.** CORM-A1 inhibits miR34a-5p expression with no cellular cytotoxicity. (a) Cell viability was assessed by MTT assay using different concentrations (10, 30, 40, 50, 100 & 200  $\mu$ M) of CORM-A1 for 24h in HUVEC and MDMs. (b) Response of physiological miR-34a-5p titers to 40  $\mu$ M of CORM-A1 was assessed miRNA quantification using qPCR. Results are expressed as mean  $\pm$  S.E.M. \* $p$  < 0.05, \*\* $p$  < 0.01, \*\*\* $p$  < 0.001 or \*\*\*\* $p$  < 0.0001 on comparison to control.
